# Supplementary material for: MoNap1, a Nucleosome Assemble Protein 1, Regulates Growth, Development, and Pathogenicity in Magnaporthe oryzae
Source: MDPI journal article supplement (doi:10.3390/jof9010050), 2022-12-28

Figure S3

**A**

MoNap1-YFP<sup>CTF</sup>+YFP<sup>NTF</sup>-MoNbp2

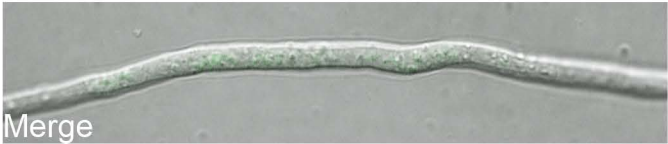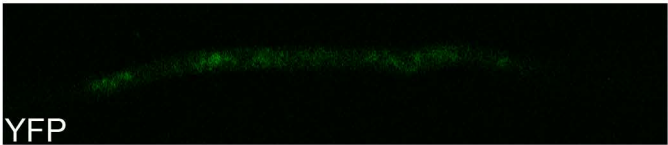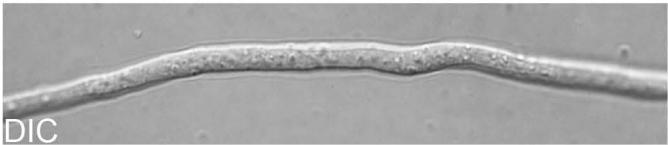

MoNap1-YFP<sup>CTF</sup>+YFP<sup>NTF</sup>

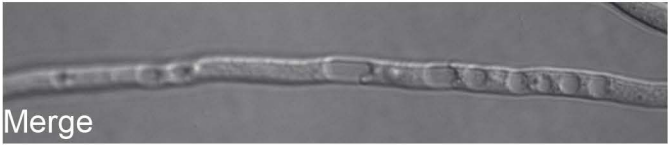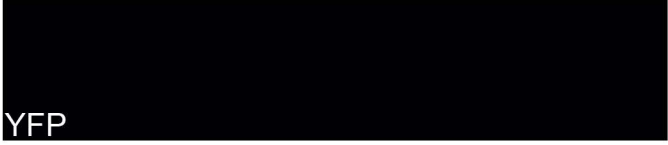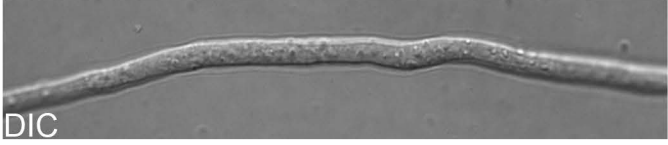

YFP<sup>CTF</sup>+YFP<sup>NTF</sup>-MoNbp2

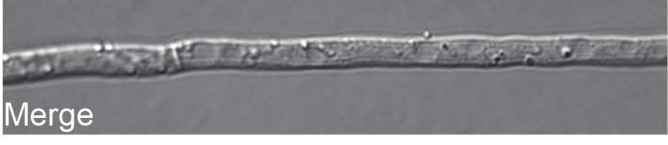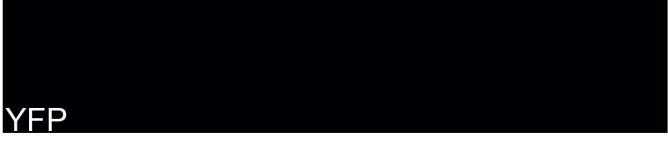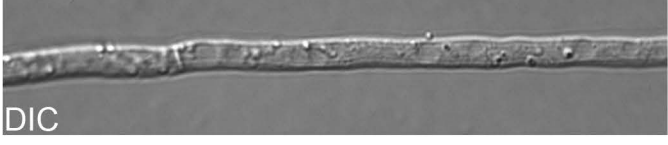

**B**

MoNap1-YFP<sup>CTF</sup>+YFP<sup>NTF</sup>-MoCib1

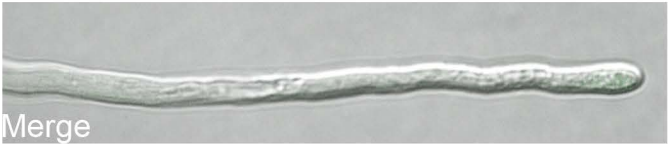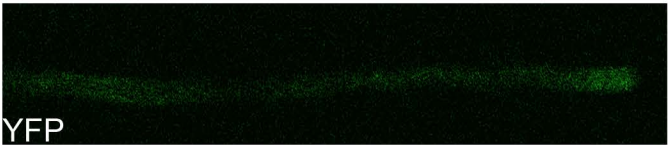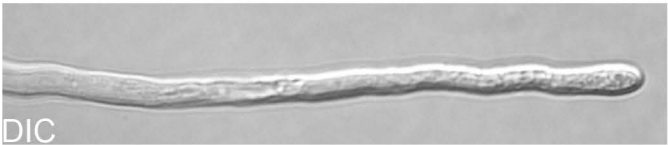

MoNap1-YFP<sup>CTF</sup>+YFP<sup>NTF</sup>

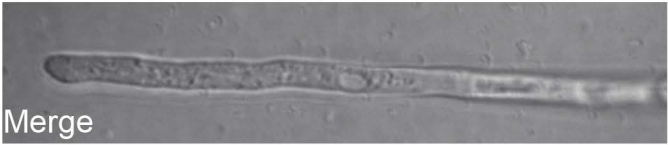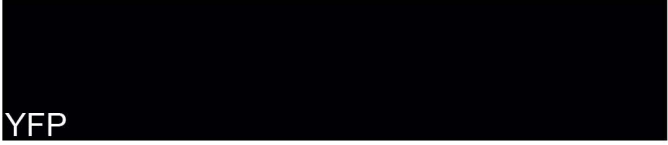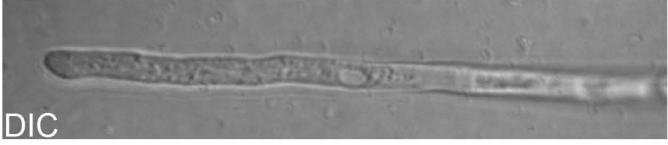

YFP<sup>CTF</sup>+YFP<sup>NTF</sup>-MoCib1

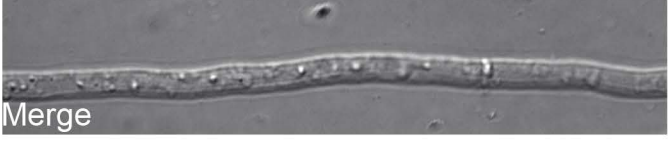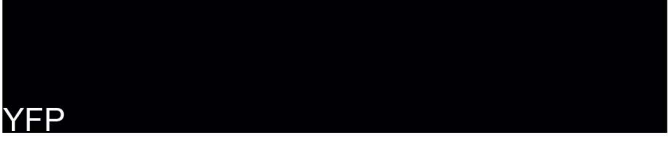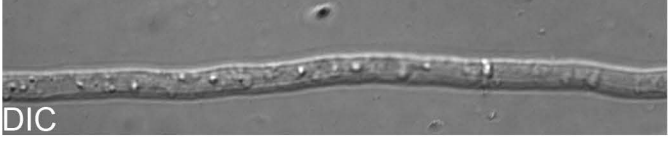

**C**

MoNap1-YFP<sup>CTF</sup>+YFP<sup>NTF</sup>-MoCib3

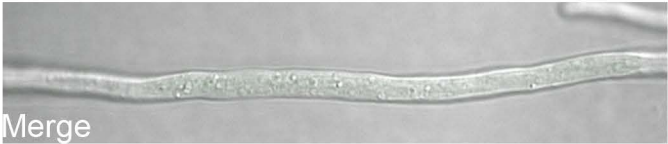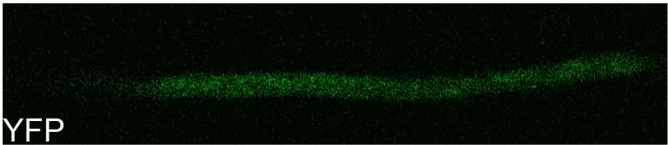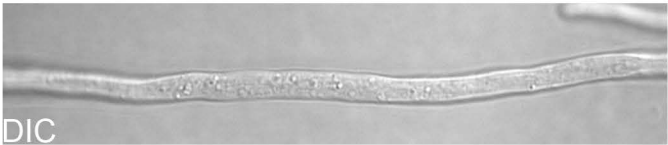

MoNap1-YFP<sup>CTF</sup>+YFP<sup>NTF</sup>

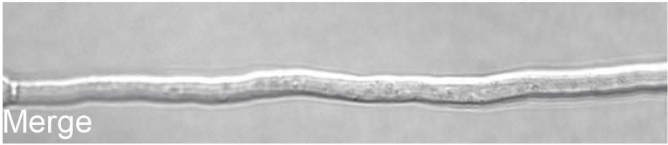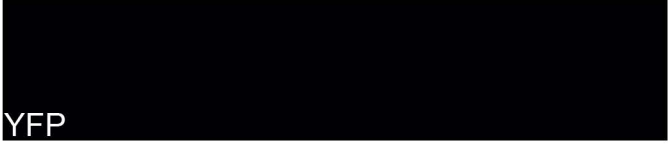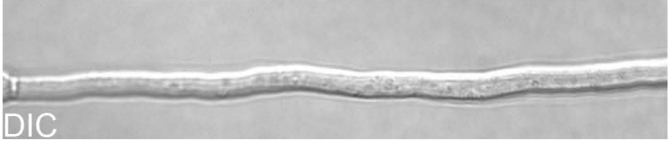

YFP<sup>CTF</sup>+YFP<sup>NTF</sup>-MoCib3

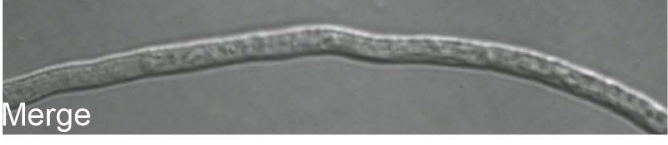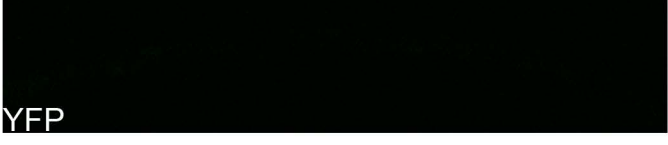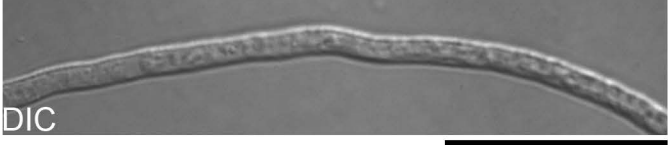

Supplement: s1 [file s1]
