# Supplementary material for: MoNap1, a Nucleosome Assemble Protein 1, Regulates Growth, Development, and Pathogenicity in Magnaporthe oryzae
Source: MDPI journal article supplement (doi:10.3390/jof9010050), 2022-12-28
Supplement: s1 [file s1]

**Table S2.** Differentially expressed genes related to melanin biosynthesis and pathogenesis in  $\Delta Monap1$  mutant using  $|\log_2\text{FoldChange}|$  values  $>1.5$  and  $\text{P}_{\text{adj}} < 0.05$

| Gene ID                     | Description                                              | Log <sub>2</sub> -fold Change | Name         |
|-----------------------------|----------------------------------------------------------|-------------------------------|--------------|
| <b>Pathogenesis</b>         |                                                          |                               |              |
| MGG_04404                   | pisatin demethylase                                      | -13.53                        | <i>PDA</i>   |
| MGG_07404                   | tripeptidyl-peptidase 1                                  | -7.46                         | <i>TPP1</i>  |
| MGG_15508                   | hypothetical protein                                     | -4.07                         | <i>ZFP6</i>  |
| MGG_16196                   | hypothetical protein                                     | -3.40                         | <i>QDR3</i>  |
| MGG_07626                   | cytochrome P450 monooxygenase                            | -3.09                         | <i>DIT2</i>  |
| MGG_06872                   | hypothetical protein                                     | -2.96                         | <i>YEP1</i>  |
| MGG_08519                   | aflatoxin B1 aldehyde reductase member 3                 | -2.66                         | <i>ALR1</i>  |
| MGG_00863                   | hypothetical protein                                     | -2.49                         | <i>SCW4</i>  |
| MGG_06772                   | hypothetical protein                                     | -2.31                         | <i>PRY2</i>  |
| MGG_12773                   | aminopeptidase Y                                         | -1.73                         | <i>APE3</i>  |
| MGG_01336                   | bacteriodes thetaiotaomicron symbiotic chitinase         | -1.72                         | <i>CTS2</i>  |
| MGG_13177                   | hypothetical protein                                     | -1.55                         | <i>SOD1</i>  |
| MGG_09246                   | protease                                                 | 1.52                          | <i>PRB1</i>  |
| MGG_09322                   | hypothetical protein                                     | 1.66                          | <i>PLP</i>   |
| MGG_08850                   | cAMP-independent regulatory protein pac2                 | 1.90                          | <i>MIT1</i>  |
| MGG_04699                   | C2H2 finger domain-containing protein FlbC               | 2.05                          | <i>FLBC</i>  |
| MGG_12442                   | aminopeptidase Y                                         | 2.31                          | <i>APE3</i>  |
| MGG_07982                   | cytochrome P450 monooxygenase                            | 2.32                          | <i>DIT2</i>  |
| MGG_00681                   | hypothetical protein                                     | 2.44                          | <i>COQ5</i>  |
| MGG_00416                   | MFS transporter                                          | 5.52                          | <i>TPO1</i>  |
| MGG_10671                   | pentalenene synthase                                     | 6.95                          | <i>PSS</i>   |
| <b>Melanin biosynthesis</b> |                                                          |                               |              |
| MGG_07219                   | conidial yellow pigment biosynthesis polyketide synthase | -4.90                         | <i>ALB1</i>  |
| MGG_13464                   | laccase                                                  | -4.75                         | <i>LAC</i>   |
| MGG_07216                   | versicolorin reductase                                   | -4.30                         | <i>STCU2</i> |
| MGG_02252                   | tetrahydroxynaphthalene reductase                        | -3.22                         | <i>BUF1</i>  |
| MGG_05059                   | scytalone dehydratase                                    | -2.90                         | <i>SDH1</i>  |
| MGG_07215                   | transcription factor Cmr1                                | -2.72                         | <i>CMR1</i>  |
