# Supplementary material for: MoNap1, a Nucleosome Assemble Protein 1, Regulates Growth, Development, and Pathogenicity in Magnaporthe oryzae
Source: MDPI journal article supplement (doi:10.3390/jof9010050), 2022-12-28
Supplement: s1 [file s1]

Table S1. Primers used in this study

| Primer Name    | Sequences (5'-3')                                             | Remarks                                      |
|----------------|---------------------------------------------------------------|----------------------------------------------|
| MoNap1_upF     | GGTACCCGGGATCCTCTAGACTACTCCATACTTTGGGCGGGTTGGTA               | Amplify 5' <i>MoNAP1</i> upstream fragment   |
| MoNap1_upR     | TTCATTGTTGACCTCCACTACGGTCTACTGCAGATGACCTCTTCTCT               | Amplify 5' <i>MoNAP1</i> upstream fragment   |
| MoNap1_downF   | GCAAAGGAATAGAGTAGATATAACAGCCGCTTCGTCCTGGTT                    | Amplify 3' <i>MoNAP1</i> downstream fragment |
| MoNap1_downR   | ACGACGGCCAGTGCCAAGCTTGCCACGGCGTATTCTTGAATCCTG                 | Amplify 3' <i>MoNAP1</i> downstream fragment |
| MoNap1_pYF11_F | ACTCACTATAGGGCGAATTGGGTACTCAAATTGGTTATACCTCCATGTTTCATCTCGGGCA | Amplify <i>MoNAP1</i> Complemented fragment  |
| MoNap1_pYF11_R | CACCACCCGGTGAACAGCTCCTCGCCCTGTCTACGCTCTGCTTGCACTCGGCGGC       | Amplify <i>MoNAP1</i> Complemented fragment  |
| MoNap1_P1      | CCATTCTGCCATACCTGACTGACGAATC                                  | Verify 5' <i>MoNAP1</i> upstream fragment    |
| MoNap1_P2      | CACCGCTGGACGACTAAACCA                                         | Verify 5' <i>MoNAP1</i> upstream fragment    |
| MoNap1_P3      | AAAAACTTACGGCGGATAGGGTGC                                      | Verify 5' <i>MoNAP1</i> upstream fragment    |
| MoNap1_P4      | ACAGGACGATGCTTCCAAGCCGA                                       | Verify 3' <i>MoNAP1</i> downstream fragment  |
| MoNap1_P5      | CCAGCACTCGTCGAGGGCAAA                                         | Verify 3' <i>MoNAP1</i> downstream fragment  |
| MoNap1_P6      | GTGGCGAGAAAGTTGCCGAAGGT                                       | Verify 3' <i>MoNAP1</i> downstream fragment  |
| MoNap1_RT_F    | CCCAACAGCCTGGTGTGACAGTATC                                     | RT-PCR of <i>MoNAP1</i>                      |
| MoNap1_RT_R    | TGCTCATCGCATCGGTGATCA                                         | RT-PCR of <i>MoNAP1</i>                      |
| Tubulin_RT_F   | CCAGCCTTCAGTCCTGGGTC                                          | RT-PCR of <i>MoTUBULIN</i>                   |
| Tubulin_RT_R   | AGGGCAGTGATCTCCTTCTG                                          | RT-PCR of <i>MoTUBULIN</i>                   |
| MoNap1_TZ_F    | CTACTCCATACTTTGGGCGGGTTGGTA                                   | Verify probe fragment                        |
| MoNap1_TZ_R    | CGGTCCTACTGCAGATGACCTCTTCTCT                                  | Verify probe fragment                        |
| MoAlb1_qrt_F   | TGACACCTTCCTCAACACC                                           | qPCR of <i>MoALB1</i>                        |
| MoAlb1_qrt_R   | CGAGCCAGATTTA AGCAGCC                                         | qPCR of <i>MoALB1</i>                        |
| MoBuf1_qrt_F   | TAC AAGCACCTCGAGATTGG                                         | qPCR of <i>MoBUF1</i>                        |
| MoBuf1_qrt_R   | CAGTA ATCTTCTGTGCGGCC                                         | qPCR of <i>MoBUF1</i>                        |
| MoRsy1_qrt_F   | TTCTCTGACA AGCTCTGG                                           | qPCR of <i>MoRSY1</i>                        |
| MoRsy1_qrt_R   | AGGGCAGTGATCTCCTTCTG                                          | qPCR of <i>MoRSY1</i>                        |
| MoZfp6_qrt_F   | GTGTGGCATCTGACCGCATGGCT                                       | qPCR of <i>MoZFP6</i>                        |
| MoZfp6_qrt_R   | ACGAACGCAAAGTTTGCTGTGGC                                       | qPCR of <i>MoZFP6</i>                        |
| MoDit2_qrt_F   | TTGGTCCGACCCCAAGAC                                            | qPCR of <i>MoDIT2</i>                        |
| MoDit2_qrt_R   | GTGGCCGTAGACGTCTGCC                                           | qPCR of <i>MoDIT2</i>                        |
| Tubulin_qrt_F  | CCAGCCTTCAGTCCTGGGTC                                          | qPCR of <i>MoTUBULIN</i>                     |
| Tubulin_qrt_R  | AGGGCAGTGATCTCCTTCTG                                          | qPCR of <i>MoTUBULIN</i>                     |
| MoCdc28_BDF    | ATGGCCATGGAGGCCGAATTCATGGAAACTACCAGAAGCTCGA                   | Amplify <i>MoCDC28</i> cDNA fragment         |
| MoCdc28_BDR    | CCGCTGCAGGTCGACGGATCCCTATCGCCTCGGGGGCGC                       | Amplify <i>MoCDC28</i> cDNA fragment         |
| MoGin4_BDF1    | ATGGCCATGGAGGCCGAATTCATGGAAGTTCGTCCCAGGC                      | Amplify <i>MoGIN4</i> cDNA fragment          |
| MoGin4_BDR1    | TGAAACTTCCTGCTGCTCTGAACTGAGCTAGC                              | Amplify <i>MoGIN4</i> cDNA fragment          |
| MoGin4_BDF2    | CAGAGCAGCAGGAAGTTTCATGCTCGCTCG                                | Amplify <i>MoGIN4</i> cDNA fragment          |
| MoGin4_BDR2    | CCGCTGCAGGTCGACGGATCCTACGAATTCAAGGTTTTGATCA                   | Amplify <i>MoGIN4</i> cDNA fragment          |
| MoClb1_BDF     | ATGGCCATGGAGGCCGAATTCATGGCTTATCACCACCACAGCA                   | Amplify <i>MoCLB1</i> cDNA fragment          |
| MoClb1_BDR     | CCGCTGCAGGTCGACGGATCCTATAAGTACGAGCCGTGGTTTG                   | Amplify <i>MoCLB1</i> cDNA fragment          |
| MoNbp2_BDF     | ATGGCCATGGAGGCCGAATTCATGATGGCTGTCTGTCTCAAAGTG                 | Amplify <i>MoNBP2</i> cDNA fragment          |
| MoNbp2_BDR     | CCGCTGCAGGTCGACGGATCCTACCGGCTCTTGCGATCT                       | Amplify <i>MoNBP2</i> cDNA fragment          |
| MoAts1_BDF     | ATGGCCATGGAGGCCGAATTCATGGACTTCGATTGGCC                        | Amplify <i>MoATS1</i> cDNA fragment          |
| MoAts1_BDR     | CCGCTGCAGGTCGACGGATCCTCAACTAGAAGGCTTTCCAATCATAA               | Amplify <i>MoATS1</i> cDNA fragment          |

|                     |                                                |                                            |
|---------------------|------------------------------------------------|--------------------------------------------|
| <b>MoCyc1_BDF</b>   | ATGGCCATGGAGGCCGAATTCATGCCCCAGCCGGACT          | Amplify <i>MoCYC1</i> cDNA fragment        |
| <b>MoCyc1_BDR</b>   | CCGCTGCAGGTCGACGGATCCCTACAGCTGGTCGATAGCTACGTC  | Amplify <i>MoCYC1</i> cDNA fragment        |
| <b>MoClb3_BDF</b>   | ATGGCCATGGAGGCCGAATTCATGGACGCAAGGCCACAACGTC    | Amplify <i>MoCLB3</i> cDNA fragment        |
| <b>MoClb3_BDR</b>   | CCGCTGCAGGTCGACGGATCCCTATGCTTGCGTCGCGGTGG      | Amplify <i>MoCLB3</i> cDNA fragment        |
| <b>MoNap1_ADF</b>   | GCCATGGAGGCCAGTGAATTCATGGCCGAGCCCATCCCAA       | Amplify <i>MoNAP1</i> cDNA fragment        |
| <b>MoNap1_ADR</b>   | CAGCTCGAGTCGATGGATCCCTAGCTCTGCTTGCACTCGGCG     | Amplify <i>MoNAP1</i> cDNA fragment        |
| <b>MoNbp2_upF</b>   | GGTACCGGGGATCCTCTAGAGTCTATTCTTACAACCCGCTCTCCG  | Amplify 5' <i>MoNBP2</i> upstream fragment |
| <b>MoNbp2_upR</b>   | TTCATTGTTGACCTCCACTAGGAAACACTCGCGACCCATCAAT    | Amplify 5' <i>MoNBP2</i> upstream fragment |
| <b>MoNbp2_downF</b> | GCAAAGGAATAGAGTAGATGTGGCGCAATACATCTGGAGTCA     | Amplify 3' <i>MoNBP2</i> upstream fragment |
| <b>MoNbp2_downR</b> | ACGACGGCCAGTGCCAAGCTTGCAAAACCGACGGTGACAGCTT    | Amplify 3' <i>MoNBP2</i> upstream fragment |
| <b>MoClb3_upF</b>   | GGTACCGGGGATCCTCTAGATCTTGCCCGCGGTTTTACTGGA     | Amplify 5' <i>MoCLB3</i> upstream fragment |
| <b>MoClb3_upR</b>   | TTCATTGTTGACCTCCACTATCAAATAGCCGAGAGTTCGGCG     | Amplify 5' <i>MoCLB3</i> upstream fragment |
| <b>MoClb3_downF</b> | GCAAAGGAATAGAGTAGATCACGTACATAATTCGAGCCCAAGG    | Amplify 3' <i>MoCLB3</i> upstream fragment |
| <b>MoClb3_downR</b> | ACGACGGCCAGTGCCAAGCTTCAGTGGTTATTGACTTGCCTATGCG | Amplify 3' <i>MoCLB3</i> upstream fragment |
| <b>MoNAP1_YFPCF</b> | CAATCACAATGGCCGGATCCATGGCCGAGCCCATCC           | Amplify <i>MoNAP1</i> BiFC fragment        |
| <b>MoNAP1_YFPCR</b> | CTTGACGGCCGGGCGCCCGGGCTCTGCTTGCACTCGGC         | Amplify <i>MoNAP1</i> BiFC fragment        |
| <b>MoNBP2_YFPNF</b> | GTCTATATCATGGCCTCTAGAATGATGGCTGTCTGTCTCAAAGTG  | Amplify <i>MoNBP2</i> BiFC fragment        |
| <b>MoNBP2_YFPNR</b> | GTCGCTTACTGCAGGTCGACCCGGCTCTTGCGATCT           | Amplify <i>MoNBP2</i> BiFC fragment        |
| <b>MoCLB1_YFPNF</b> | GTCTATATCATGGCCTCTAGAATGGCTTATCACCACCACAGCA    | Amplify <i>MoCLB1</i> BiFC fragment        |
| <b>MoCLB1_YFPNR</b> | GTCGCTTACTGCAGGTCGACTAAGTACGAGCCGTGGTTTG       | Amplify <i>MoCLB1</i> BiFC fragment        |
| <b>MoCLB3_YFPNF</b> | GTCTATATCATGGCCTCTAGAATGGACGCAAGGGTAAGCGCA     | Amplify <i>MoCLB3</i> BiFC fragment        |
| <b>MoCLB3_YFPNR</b> | GTCGCTTACTGCAGGTCGACTGCTTGCGTCGCGGTGG          | Amplify <i>MoCLB3</i> BiFC fragment        |

---
