# Supplementary figures and images for: MoNap1, a Nucleosome Assemble Protein 1, Regulates Growth, Development, and Pathogenicity in Magnaporthe oryzae
Source: MDPI journal article supplement (doi:10.3390/jof9010050), 2022-12-28

Figure S6

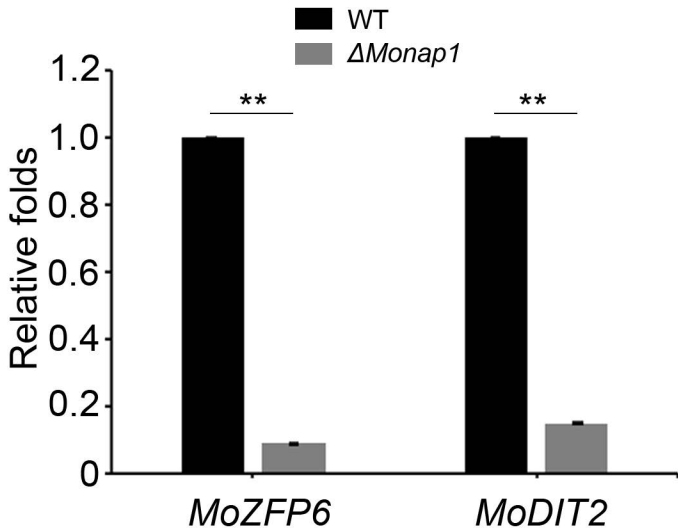

Supplement: s1 [file s1]

**Figure S4**

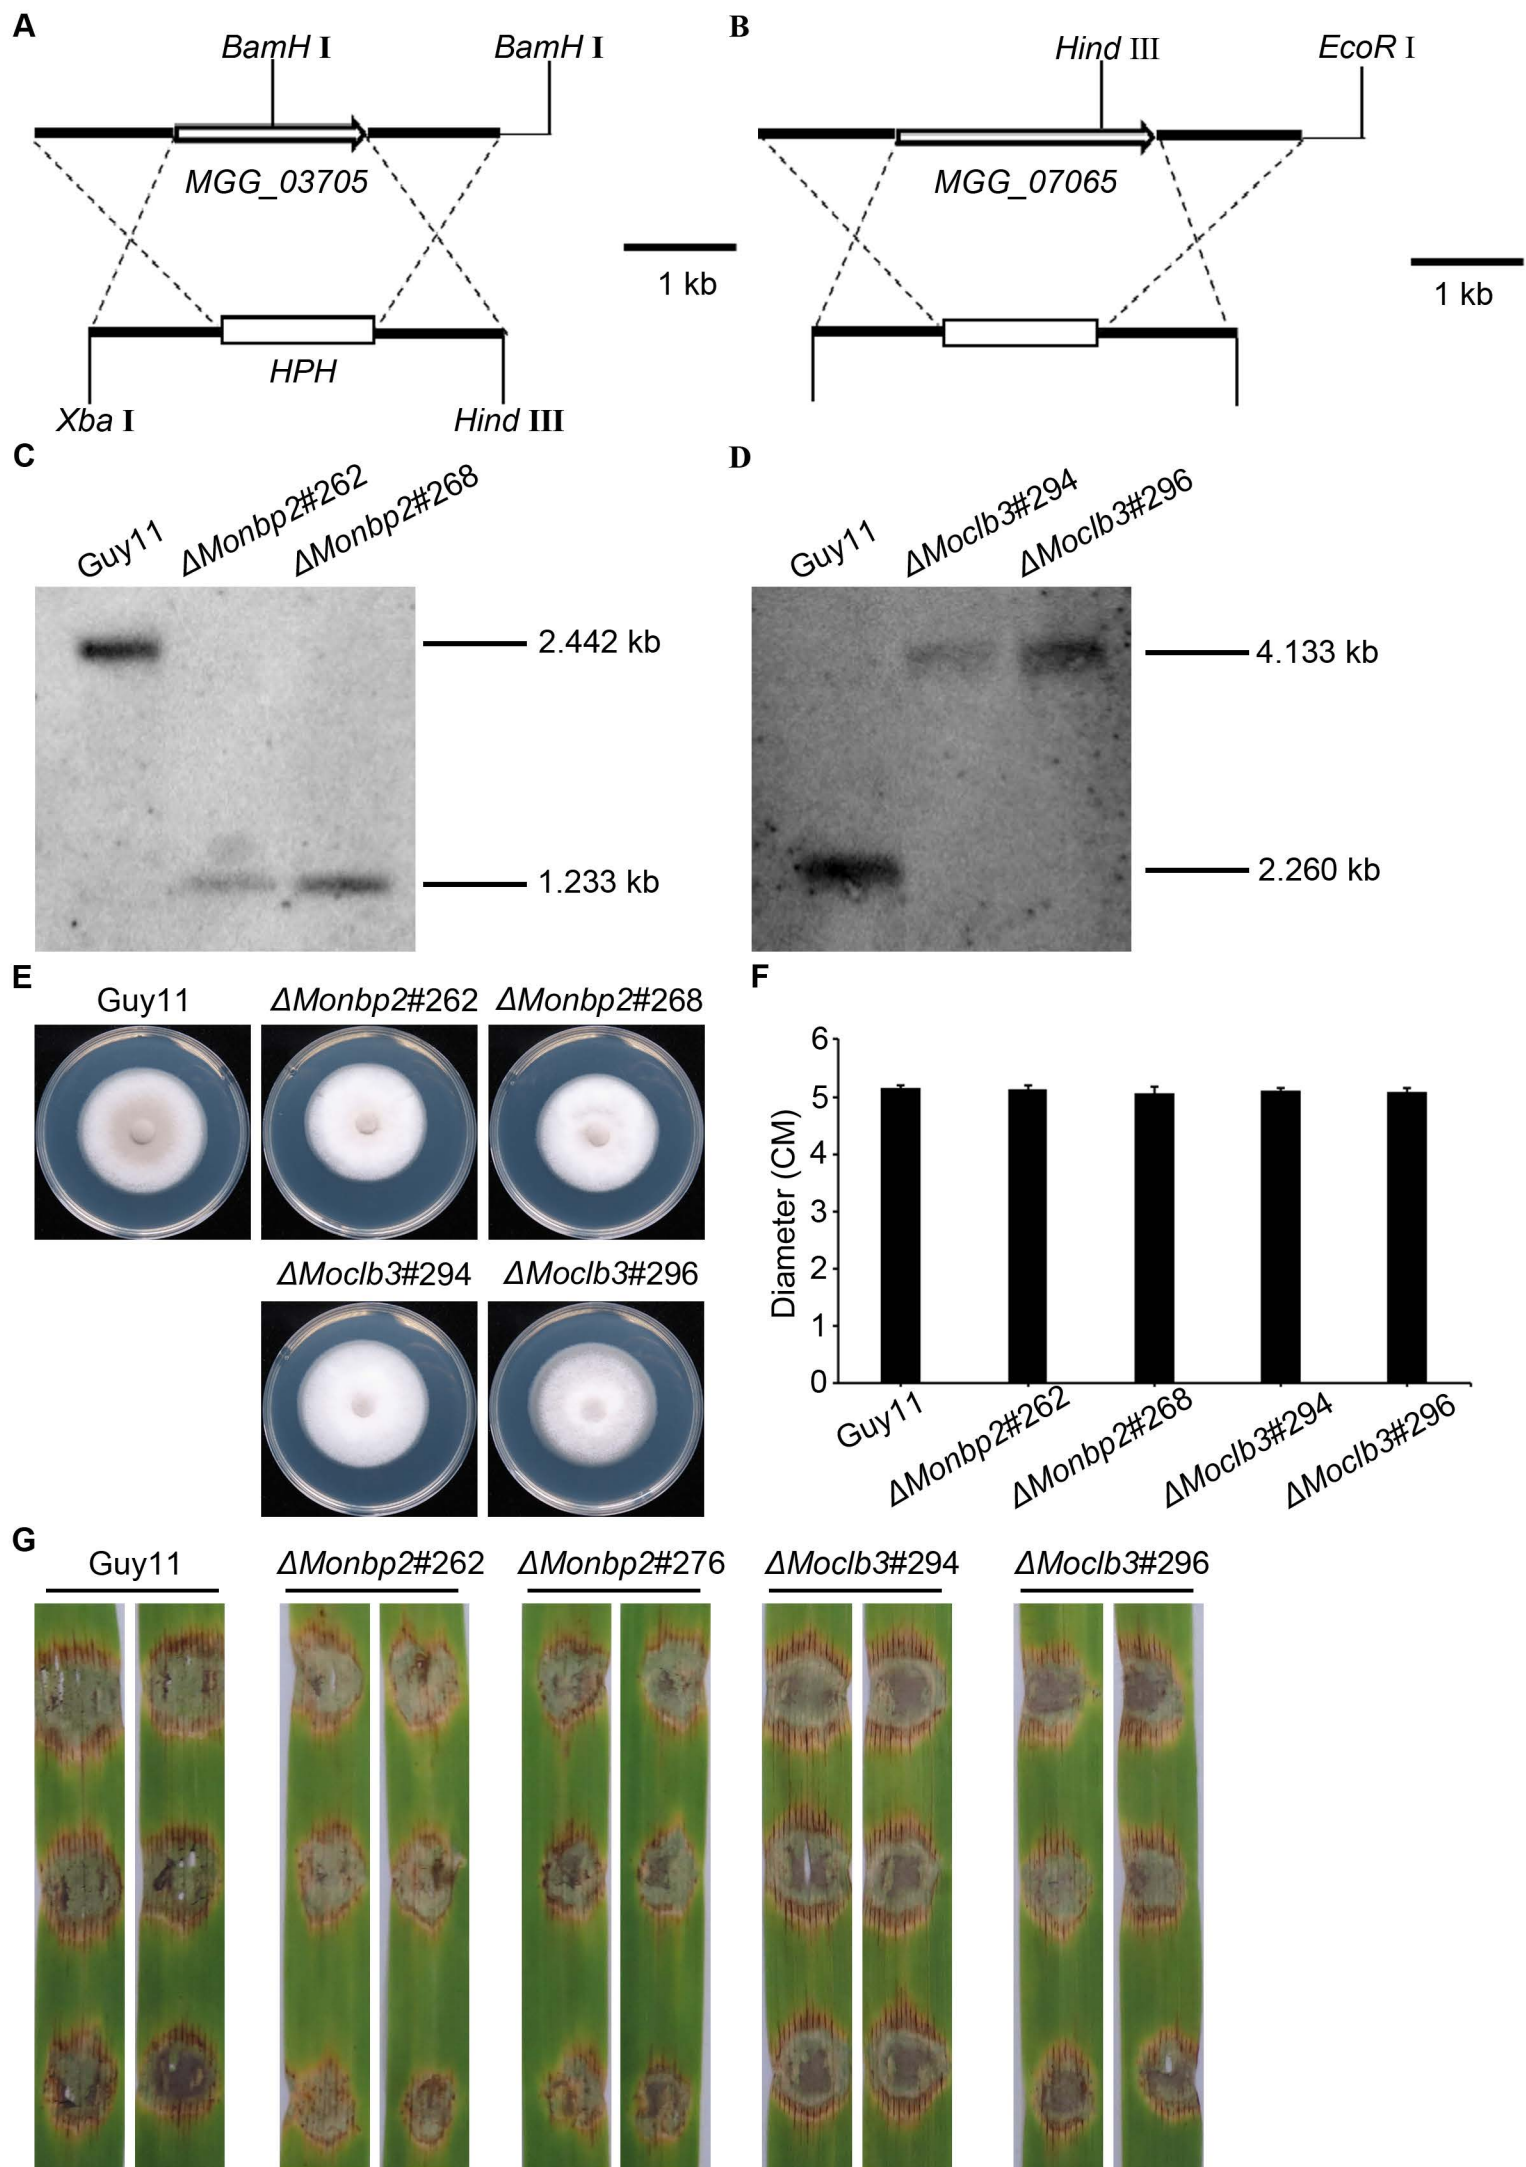

Supplement: s1 [file s1]

Figure S5

A

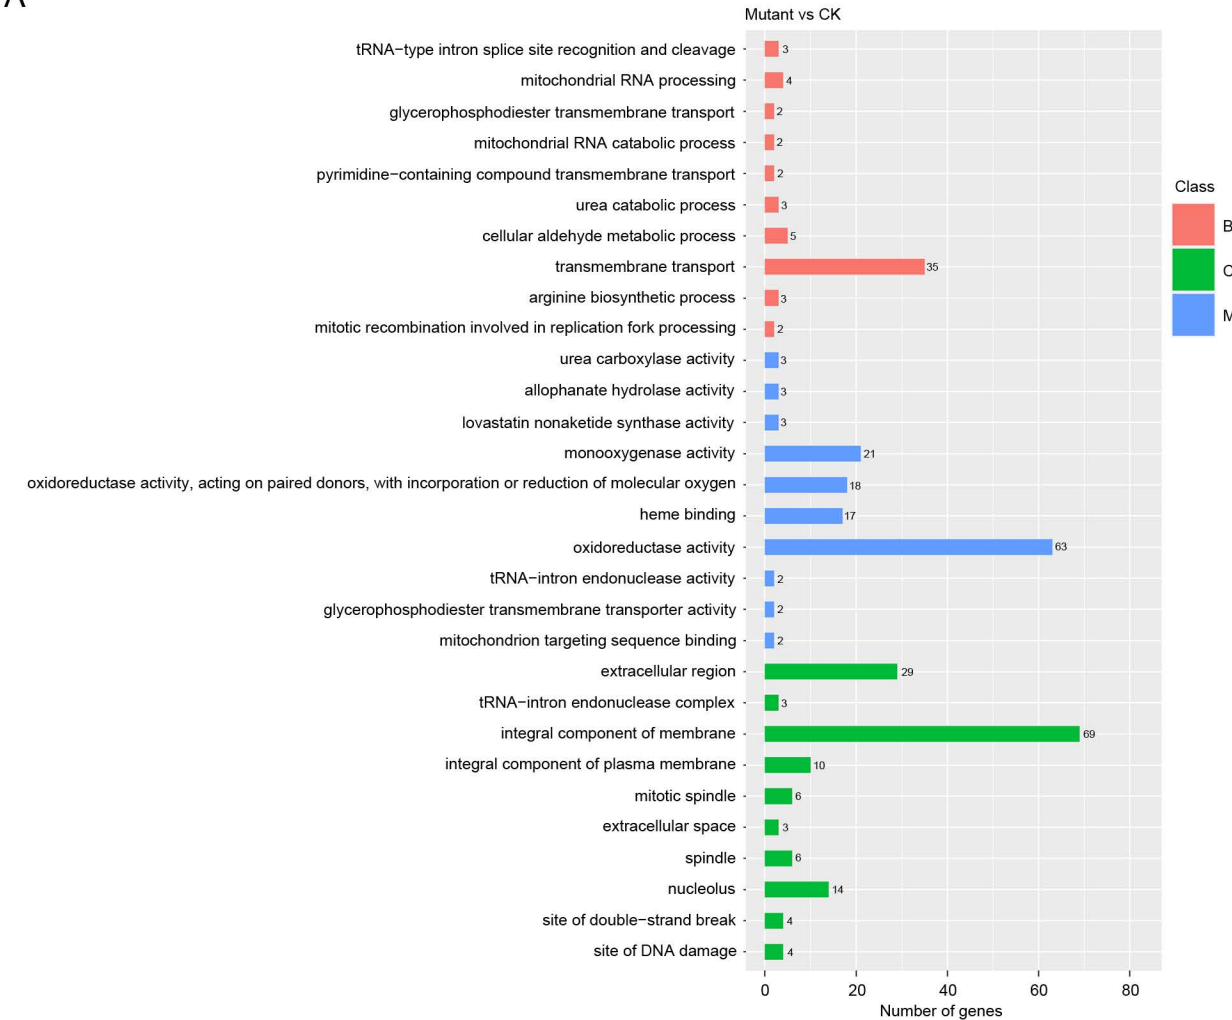

B

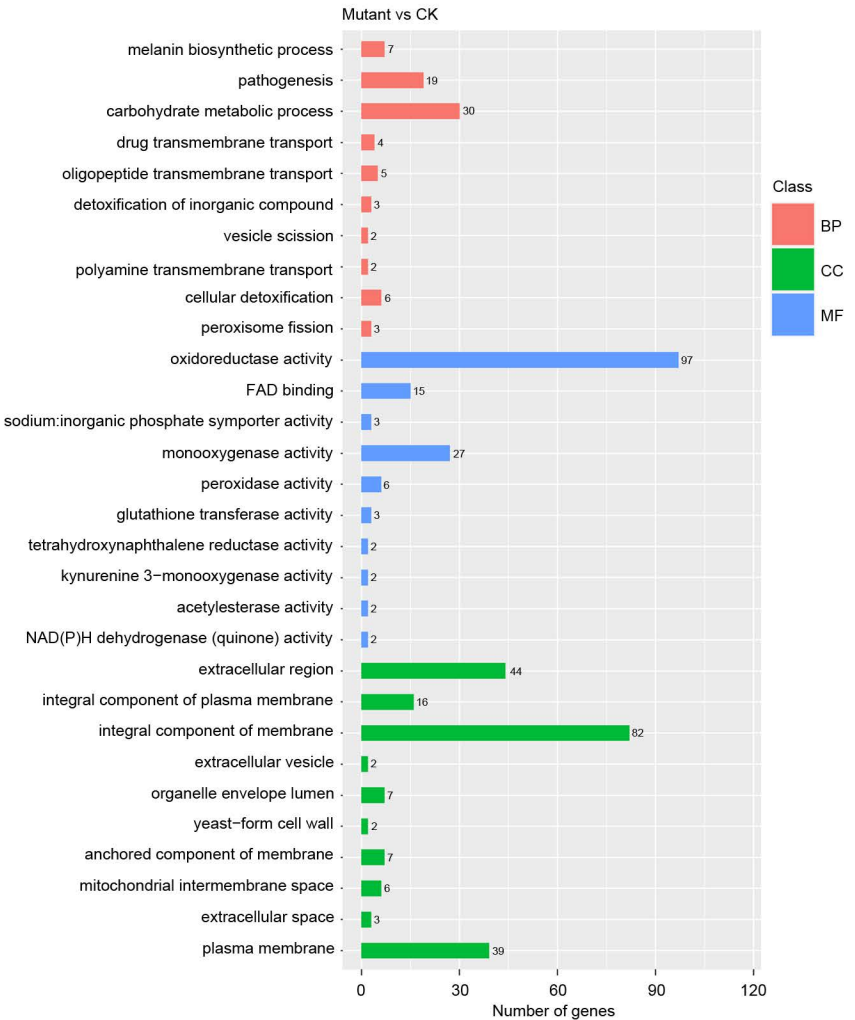

Supplement: s1 [file s1]

**Figure S2**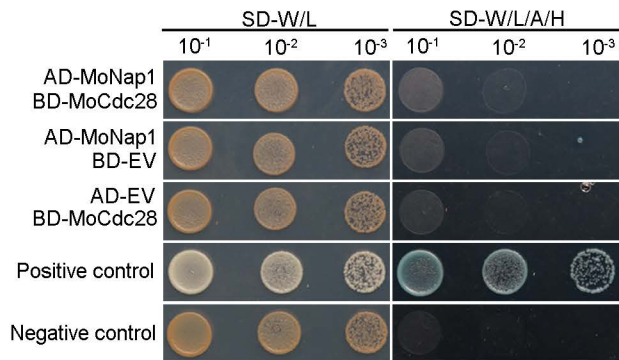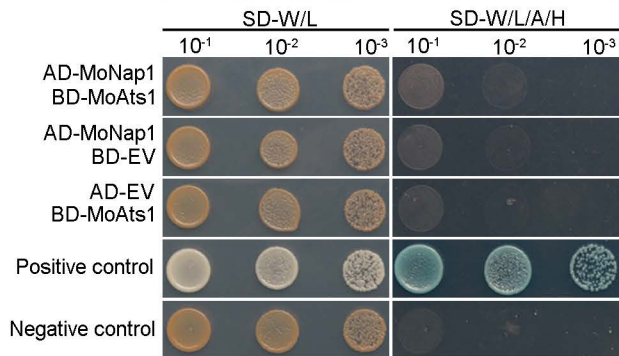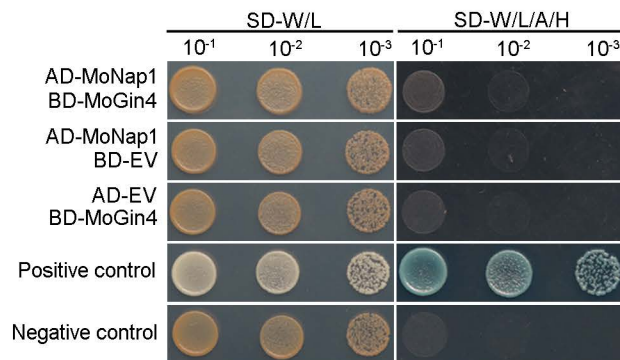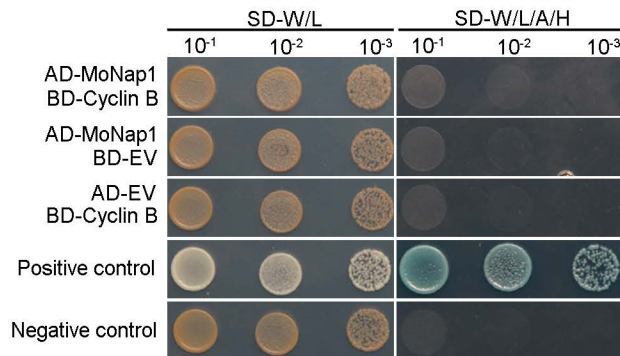

Supplement: s1 [file s1]

**Figure S1**

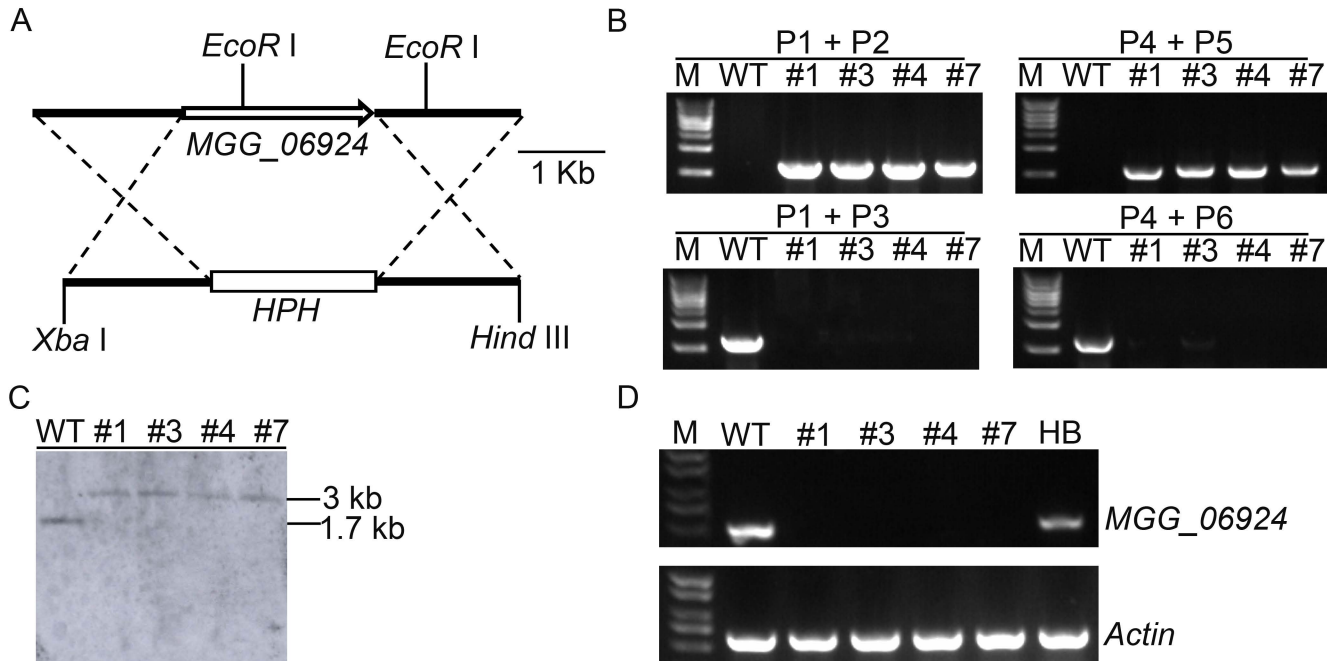

Supplement: s1 [file s1]

Figure S7

A

Pathway Name

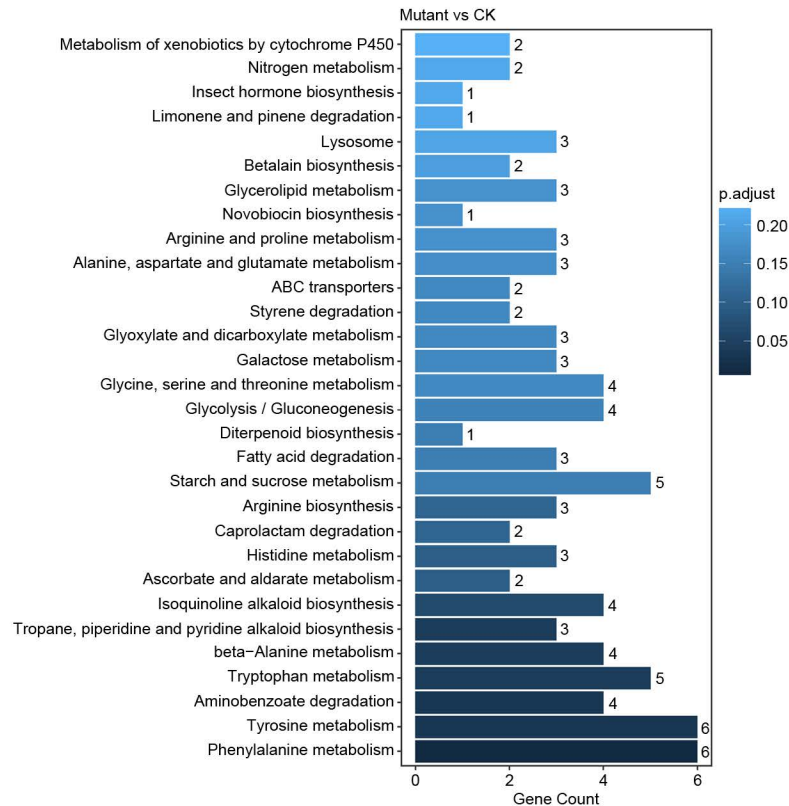

B

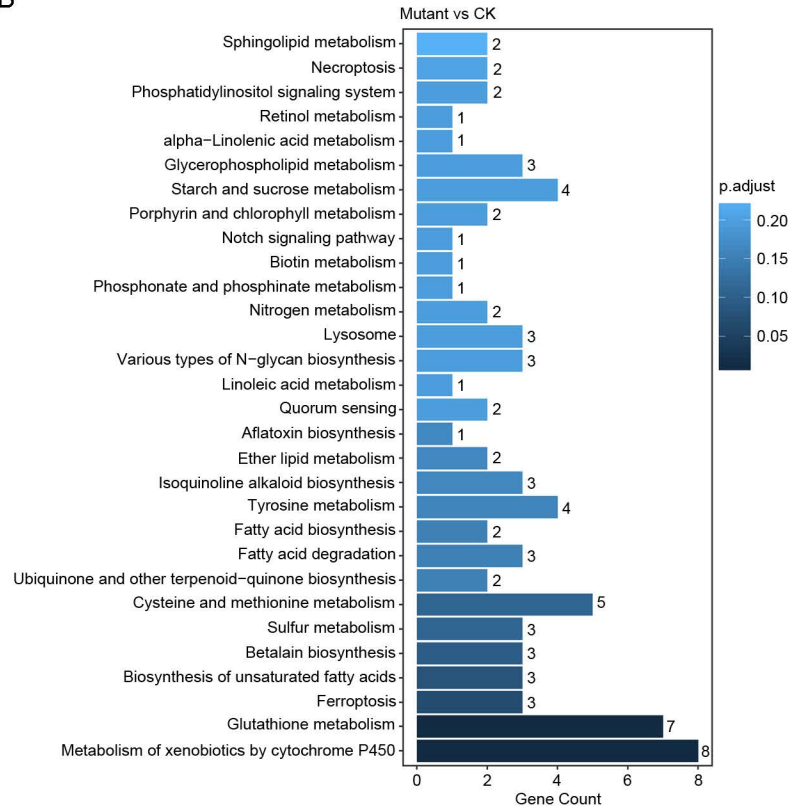

Supplement: s1 [file s1]
